# Supplementary material for: Vibronic spectra of protonated hydroxypyridines: contributions of prefulvenic and planar structures
Source: Royal Society of Chemistry journal article supplement (doi:10.1039/c6cp08623c), 2017-01-01
Supplement: c6cp08623c1.pdf [file c6cp08623c1.pdf]

**Supplementary Materials:**

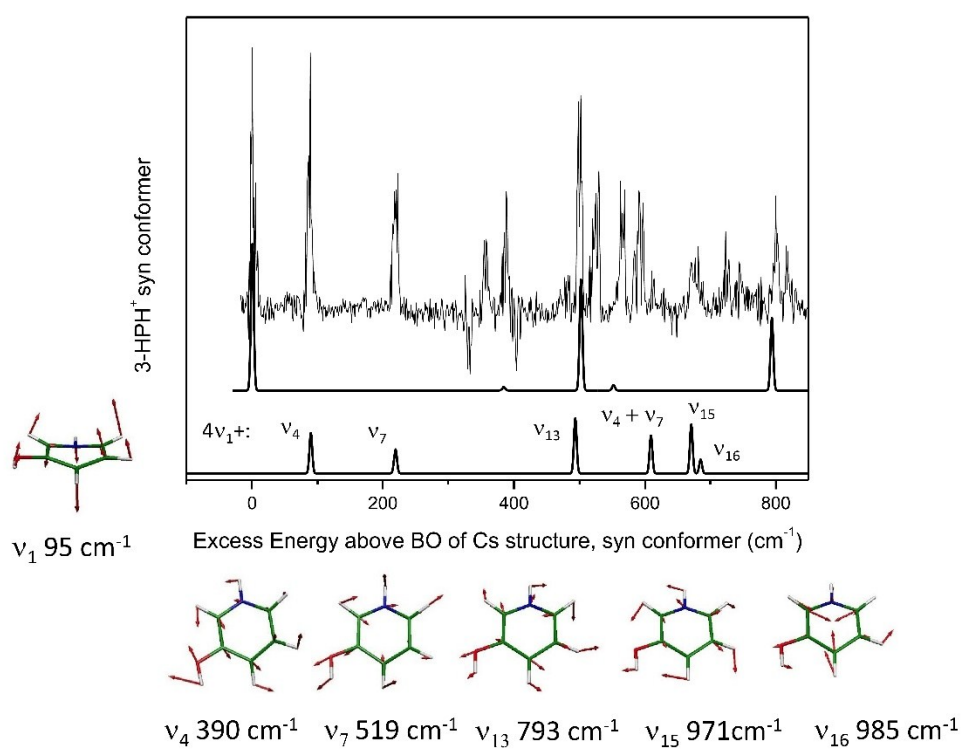

Figure S11: Comparison of the experimental (top) and Franck-Condon simulated spectra of the 3-HPH<sup>+</sup> *syn* conformer.
